# Supplementary material
Source: Springer Nature journal article supplement (https://www.springermedizin.de/resource/supplementary/12913_2013_3112_MOESM2_ESM.pdf/9532466)

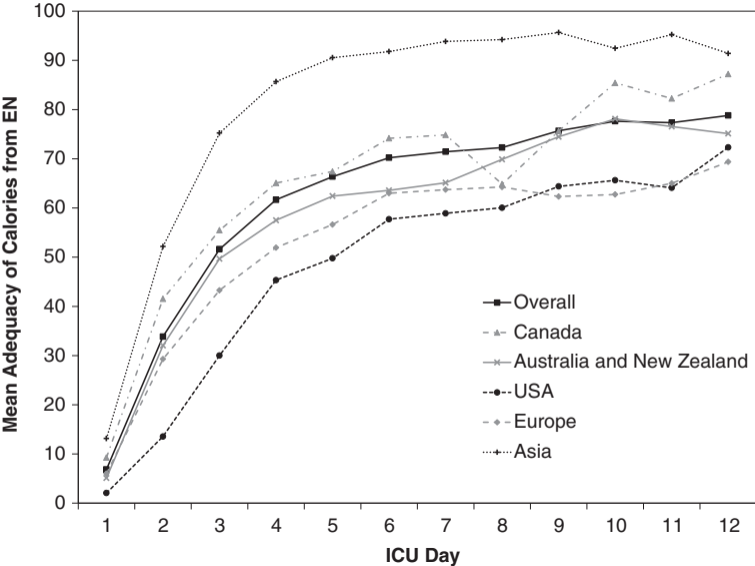

Supplement: MOESM2 [file 9532466]
